# 1 Mass Cytometric and Transcriptomic Profiling of Epithelial-Mesenchymal 2 Transitions in Human Mammary Cell Lines

3 Johanna Wagner<sup>1</sup>, Markus Masek<sup>2</sup>, Andrea Jacobs<sup>1</sup>, Charlotte Soneson<sup>3</sup>, Nicolas Damond<sup>1</sup>,  
4 Natalie de Souza<sup>1,4</sup>, Mark D. Robinson<sup>3</sup>, and Bernd Bodenmiller<sup>1,5</sup>

5 1. Department of Quantitative Biomedicine, University of Zurich, Winterthurerstrasse 190,  
6 8057 Zurich, Switzerland

7 2. Department of Molecular Life Sciences, University of Zurich, Winterthurerstrasse 190,  
8 8057 Zurich, Switzerland

9 3. Department of Molecular Life Sciences and SIB Swiss Institute of Bioinformatics,  
10 University of Zurich, Winterthurerstrasse 190, 8057 Zurich, Switzerland

11 4. Institute for Molecular Systems Biology, Department of Biology, ETH-Zurich, Otto-Stern-  
12 Weg 3, 8093 Zurich, Switzerland

13 5. Institute for Molecular Health Sciences, ETH Zurich, Otto-Stern-Weg 7, 8093 Zurich,  
14 Switzerland

15

16 Corresponding author: Bernd Bodenmiller ([bernd.bodenmiller@dqbm.uzh.ch](mailto:bernd.bodenmiller@dqbm.uzh.ch))

17

## 18 Abstract

19 Epithelial-mesenchymal transition (EMT) equips breast cancer cells for metastasis and  
20 treatment resistance. Inhibition and elimination of EMT-undergoing cells are therefore  
21 promising therapy approaches. However, detecting EMT-undergoing cells is challenging due  
22 to the intrinsic heterogeneity of cancer cells and the phenotypic diversity of EMT programs.  
23 Here, we profiled EMT transition phenotypes in four non-cancerous human mammary  
24 epithelial cell lines using a FACS surface marker screen, RNA sequencing, and mass  
25 cytometry. EMT was induced in the HMLE and MCF10A cell lines and in the HMLE-Twist-  
26 ER and HMLE-Snail-ER cell lines by chronic exposure to TGF $\beta$ 1 or 4-hydroxytamoxifen,  
27 respectively. We observed a spectrum of EMT transition phenotypes in each cell line and the  
28 spectrum varied across the time course. Our data provide multiparametric insights at single-  
29 cell level into the phenotypic diversity of EMT at different time points and in four human  
30 cellular models. These insights are valuable to better understand the complexity of EMT, to  
31 compare EMT transitions between the cellular models used herein, and for the design of EMT  
32 time course experiments.

33

|                                  |                                                                                                |
|----------------------------------|------------------------------------------------------------------------------------------------|
| Measurement(s)                   | Human mammary epithelial cell lines • epithelial-mesenchymal transition • single-cell analysis |
| Technology Type(s)               | Mass cytometry • Flow cytometry • RNA sequencing • Cell culture                                |
| Factor Type(s)                   | Epithelial-mesenchymal transition induced by TGF $\beta$ 1 and 4-hydroxytamoxifen              |
| Sample Characteristic - Organism | Homo sapiens                                                                                   |

34 Mendeley Data: DOI: 10.17632/pt3gmyk5r2.1

35 ArrayExpress Data: Accession number E-MTAB-9365

36

### 37 **Background & Summary**

38 The epithelial-mesenchymal transition (EMT) equips epithelial cells with migratory, survival,  
39 and plasticity properties upon loss of epithelial hallmark characteristics. Together with its  
40 reverse process, the mesenchymal-epithelial transition, EMT contributes to cancer metastasis,  
41 provides resistance to cell death and chemotherapy, confers stemness properties to cancer  
42 cells, and interferes with immunotherapy<sup>1-3</sup>. EMT inhibition and elimination of EMT-  
43 undergoing cells are therefore investigated as approaches for cancer therapy<sup>4</sup>. However,  
44 detecting cancer cells undergoing EMT is challenging due to the intrinsic heterogeneity of  
45 cancer cells and the phenotypic diversity of EMT programs<sup>4</sup>.

46 A hallmark characteristic of epithelial cells is adhesion to neighboring cells and to the  
47 basement membrane<sup>1</sup>. To prevent anchorage-independent growth, epithelial cells normally  
48 undergo anoikis upon neighbor or matrix detachment<sup>5</sup>. During EMT, normal adhesion  
49 complexes, e.g. involving E-Cadherin, epithelial cell adhesion molecule (EpCAM), and  
50 laminin receptor integrin  $\alpha6\beta1$  (CD49f/CD29), are dissolved and resistance to anoikis is  
51 established<sup>6,7</sup>. Concomitant cytoskeletal rearrangements break down the epithelial apico-basal  
52 orientation and induce a motile front-back polarity, which often includes a replacement of  
53 cytokeratins with Vimentin<sup>8</sup>. EMT can further confer stemness properties to epithelial  
54 cells<sup>9,10</sup>. Numerous signaling pathways can trigger EMT, including TGF $\beta$ 1, Notch, Hedgehog,  
55 WNT, and hypoxia, and activate downstream transcriptional drivers such as Snail family zinc  
56 finger transcription factors (TF), Twist family BHLH TFs, zinc finger E-box binding  
57 homeobox TFs, and homeobox TF PRRX1<sup>11</sup>. Regulation of EMT occurs by integration of  
58 epigenetic, transcriptional, post-transcriptional, and protein stability controls<sup>11,12</sup>. Together,  
59 this shows that the phenotypes of EMT-undergoing cells are shaped by complex molecular  
60 circuitries.

61 EMT is increasingly viewed more as a phenotypic continuum with intermediate states  
62 and less as a shift between two discrete states, and the concepts of ‘partial EMT’ and ‘hybrid  
63 EMT’ phenotypes have been introduced<sup>4,13</sup>. A systems biology approach used gene expression  
64 profiles of four non-small cell lung cancer cell lines to detect three intermediate states termed  
65 ‘pre-EMT’, ‘metastable EMT’, and ‘epigenetically-fixed’<sup>14</sup>. Transcriptomics of cell lines and  
66 clinical samples of cancer was used to rank the resulting spectrum of EMT states, showing  
67 that only some were linked to poor survival<sup>15</sup>. However, identification of EMT-undergoing  
68 cells in metastatic cancer tissue is still often based on co-expression of a few epithelial and  
69 mesenchymal markers<sup>16,17</sup>. This can be misleading as several of the ‘mesenchymal’ markers,  
70 e.g. Vimentin, can also be expressed by non-malignant epithelial cells<sup>18</sup>. It remains an ongoing  
71 debate which markers and combination of markers are sufficient to distinguish EMT from  
72 other processes *in vitro* and *in vivo*<sup>4,19</sup>. In particular, there remains the need for a  
73 comprehensive analysis of EMT phenotypes at the protein level.

74 To address this need, we applied multiplex single-cell mass cytometry<sup>20</sup> to four non-  
75 cancerous human mammary epithelial cell lines that serve as widely-used models of EMT.  
76 EMT was induced in the HMLE and MCF10A cell lines by chronic exposure to TGF $\beta$ 1<sup>16,21</sup>  
77 and in the HMLE-Twist-ER (HTER) and HMLE-Snail-ER (HSER) cell lines by treatment  
78 with 4-hydroxytamoxifen (4OHT)<sup>9</sup>. In the HTER and HSER cell lines, 4OHT treatment  
79 allows the induction of gene expression by murine Twist1 fused to a modified estrogen

80 receptor (ER) or SNAIL1-ER fusion protein, respectively<sup>9</sup>. To design our mass cytometry  
81 antibody panel, we conducted a fluorescence-based surface protein screen in parallel with a  
82 transcriptome analysis at multiple time points of induced EMT. We observed alterations in  
83 the surface proteome of EMT-undergoing cells over time and detected distinct gene  
84 expression profiles of hybrid epithelial-mesenchymal states compared with epithelial and  
85 mesenchymal states. From these analyses, we extracted candidate markers for multiplex mass  
86 cytometry, which revealed complex phenotypic transitions in all four EMT models and little  
87 phenotypic overlap of EMT states between the cell lines. The data presented here can aid in  
88 characterizing the complexity and dynamics of EMT in these widely used *in vitro* models.

89

## 90 **Methods**

91

### 92 **Material**

93 A table listing the material used in this study can be found on Mendeley Data (Online-only Table 1)<sup>25</sup>.

94

### 95 **Cell lines**

96 The MCF10A human mammary epithelial cell line was obtained from the American Type Culture Collection  
97 (ATCC) and cultured in DMEM F12 Ham medium (Sigma Aldrich) supplemented with 10 µg/ml human insulin  
98 (Sigma Aldrich), 20 ng/ml epidermal growth factor (EGF, Peprotech), 500 ng/ml hydrocortisone (Sigma  
99 Aldrich), 5% horse serum (Gibco), 100 ng/ml cholera toxin (Sigma Aldrich), and PenStrep (Gibco). The HMLE,  
100 HMLE-Twist-ER (HTER), and HMLE-Snail-ER (HSER) cell lines were a gift from the laboratory of Prof.  
101 Robert Weinberg at the Whitehead Institute for Biomedical Research and the Massachusetts Institute of  
102 Technology and were cultured in a 1:1 mixture of DMEM F12 Ham medium (Sigma Aldrich) supplemented  
103 with 10 µg/ml human insulin (Sigma Aldrich), 10 ng/ml EGF (Peprotech), 500 ng/ml hydrocortisone (Sigma  
104 Aldrich), and PenStrep (Gibco) with the mammary epithelial growth medium (MEGM<sup>TM</sup>) BulletKit<sup>TM</sup> (Lonza).  
105 For the HTER and HSER cell lines, the growth medium was supplemented with 1 µg/ml Blasticidin S  
106 (InvivoGen).

107

### 108 **EMT time courses and cell harvesting**

109 EMT was induced in the MCF10A cell line by chronic stimulation with 5 ng/ml TGFβ1 (Cell Signaling  
110 Technology) for eight days<sup>22</sup>. For this, 0.8 million cells were seeded per 10 cm cell culture dish (Nunc) and  
111 incubated at 37 °C and 5% CO<sub>2</sub> according to ATCC recommendations. TGFβ1 treatment and vehicle treatment  
112 using Dulbecco's phosphate buffer saline (PBS, Sigma Aldrich) started 24 hours after seeding and was applied  
113 daily together with a growth medium exchange.

114

115 EMT was induced in the HMLE cell line by chronic stimulation with 4 ng/ml TGFβ1 (Cell Signaling  
116 Technology) for 14 days<sup>9</sup>. For this, 0.5 million cells were seeded per 10 cm cell culture dish (Nunc) and incubated  
117 at 37 °C and 5% CO<sub>2</sub>. TGFβ1 treatment and vehicle treatment using PBS (Sigma Aldrich) started 24 hours after  
118 seeding and was applied daily. The growth medium was exchanged every other day.

119

120 EMT was induced in the HTER and HSER cell lines by chronic stimulation with 4 ng/ml 4-hydroxytamoxifen  
121 (4OHT; Sigma Aldrich) for 14 days<sup>9</sup>. For this, 0.5 million cells were seeded per 10 cm cell culture dish (Nunc)  
122 and incubated at 37 °C and 5% CO<sub>2</sub>. 4OHT treatment and vehicle treatment using methanol (Thommen Furler)  
123 started 24 hours after seeding and was applied daily. The growth medium was exchanged every other day.

124

125 To avoid over-confluence and senescence during the time course of HMLEs, HTERs, and HSERs, the cells were  
126 split and re-seeded on day four and eight. For this, the cells were washed once with pre-warmed PBS, incubated  
127 for 5 min at 37 °C with 4 ml pre-warmed TrypLE 1X Express (Gibco), quenched with pre-warmed growth  
128 medium, pelleted at 350 x g for 5 min at room temperature, resuspended in pre-warmed growth medium, and re-  
129 seeded using 0.5 million cells per 10 cm cell culture dish.

130 For harvesting, the cells were washed once with pre-warmed PBS, incubated for 5 min at 37 °C with pre-warmed  
131 TrypLE 1X Express (Gibco), fixed for 10 min at room temperature with 1.6% paraformaldehyde (PFA, Electron  
132 Microscopy Sciences), scraped off the dish using a cell scraper (Sarstedt AG), and quenched using 4 °C growth

133 medium. The cells were pelleted at 600 x g for 4 min at 4 °C, resuspended in 4 °C PBS at a concentration of  
134 about 0.5 million cells per ml and frozen at -80 °C. For mass cytometry analysis, 5-Iodo-2'-deoxyuridine (IdU)  
135 at 10 µM was added to the medium 20 min before cell harvesting<sup>23</sup>.

136

### 137 **Mass-tag cellular barcoding**

138 To minimize inter-sample staining variation, we applied mass-tag barcoding to fixed cells<sup>24</sup>. A barcoding scheme  
139 composed of unique combinations of four out of nine barcoding metals was used for this study; metals included  
140 palladium (<sup>105</sup>Pd, <sup>106</sup>Pd, <sup>108</sup>Pd, <sup>110</sup>Pd, Fluidigm) conjugated to bromoacetamidobenzyl-EDTA (Dojindo) as well  
141 as indium (<sup>113</sup>In and <sup>115</sup>In, Fluidigm), yttrium, rhodium, and bismuth (<sup>89</sup>Y, <sup>103</sup>Rh, <sup>209</sup>Bi, Sigma Aldrich) conjugated  
142 to maleimido-mono-amide-DOTA (Macrocyclics). The concentrations were adjusted to 20 nM (<sup>209</sup>Bi), 100 nM  
143 (<sup>105-110</sup>Pd, <sup>115</sup>In, <sup>89</sup>Y), 200 nM (<sup>113</sup>In), or 2 µM (<sup>103</sup>Rh). Cells were randomly distributed across a 96-well plate  
144 and about 0.3 million cells per well were barcoded using a transient partial permeabilization protocol. Cells were  
145 washed once with 0.03% saponin in PBS (Sigma Aldrich) prior to incubation in 200 µl barcoding reagent for 30  
146 min at room temperature. Cells were then washed four times with cell staining medium (CSM, PBS with 0.3%  
147 saponin, 0.5% bovine serum albumin (BSA, Sigma Aldrich) supplemented with 2 mM EDTA (Stemcell  
148 Technologies) and pooled for antibody staining.

149

### 150 **Fluorescence cellular barcoding and FACS surface protein screen**

151 To apply the FACS surface protein screen to multiple samples simultaneously, we performed fluorescence  
152 barcoding of fixed cells. For this, 18 million cells were washed once with CSM prior to incubation in 3 ml  
153 barcoding reagent for 20 min at 4 °C in the dark. As barcoding reagents Alexa Fluor-700-NHS-Ester (AF700,  
154 Molecular Probes) and Pacific Orange-NHS-Ester (PO, Molecular Probes) dissolved in dimethyl sulfoxide  
155 (DMSO) at 200 µg/ml were used. Single stains or a combination of AF700 and PO were performed in CSM at a  
156 final concentration of 0.1 µg/ml or 1 µg/ml and 0.4 µg/ml or 2 µg/ml, respectively. Cells were washed twice  
157 with CSM before pooling and staining with E-Cadherin-AF647 (clone 67A4, Biolegend) and EpCAM-FITC  
158 (clone 9C4, Biolegend) or CD44-FITC (clone IM7, Biolegend) for 20 min at 4 °C in the dark. Cells were washed  
159 once with CSM and filtered through a 40 µm cell strainer. About 0.3 million cells in 37.5 µl CSM were loaded  
160 in each well of a 96-well plate of the Human Cell Surface Marker Screening (phycoerythrin [PE]) Kit  
161 (Biolegend). Each well contained 12.5 µl of diluted PE-conjugated antibody in CSM. The cells were incubated  
162 for 30 min at 4 °C in the dark, according to manufacturer's instructions. The cells were then washed twice with  
163 CSM, fixed with 1.6% PFA in PBS for 10 min at room temperature in the dark and washed twice with CSM  
164 again, prior to FACS analysis using the LSRFortessa Cell Analyzer (BD Biosciences).

165

### 166 **FACS sorting and RNA sequencing**

167 For live cell FACS sorting, cells were washed once with pre-warmed PBS, incubated for 5 min at 37 °C with 4  
168 ml pre-warmed TrypLE 1X Express (Gibco), pipetted off the cell culture dish, and collected in 4 °C PBS. Cells  
169 were pelleted at 350 x g for 5 min at 4 °C, re-suspended in 4 °C PBS with 1% BSA, and stained with E-Cadherin-  
170 AF647 (clone 67A4, 5 µg/ 100 µl, Biolegend) and CD44-PE (clone IM7, 1.25 µg/ 100 µl, Biolegend) for 20 min  
171 at 4 °C in the dark. Cells were washed once using PBS with 1% BSA and kept on ice until FACS sorting using  
172 the FACSAria III (BD Biosciences). For RNA isolation, cells were pelleted at 350 x g for 5 min at 4 °C and  
173 lysed in 350 µl RLT buffer of the RNeasy Mini Kit (Qiagen). RNA was isolated according to the manufacturer's  
174 instructions. Briefly, RNA was collected on the RNeasy spin column, washed with 70% ethanol (Merck), and  
175 DNA was removed by incubation with DNase I (Qiagen). RNA was collected in 30-50 µl diethylpyrocarbonate  
176 (DEPC, Sigma Aldrich)-containing water and stored at -80 °C. DEPC water was prepared by dissolving 1 ml  
177 DEPC in 1 L ddH<sub>2</sub>O prior to autoclaving. The RNA quality was assessed using a NanoDrop (Thermo Scientific)  
178 and Bioanalyzer (Agilent). RNA sequencing was performed using the HiSeq 2500 System (Illumina) in SR 50  
179 mode (50 base reads) after poly (A) enrichment and stranded library preparation.

180

### 181 **Antibodies and antibody labeling**

182 All antibodies and corresponding clone, provider, and metal or fluorescence tag are listed in the Online-only  
183 Table 1 and Online-only Table 20 on Mendeley Data<sup>25</sup>. Target specificity of the antibodies was confirmed in our  
184 laboratory. Antibodies were obtained in carrier/ protein-free buffer or were purified using the Magne Protein A  
185 or G Beads (Promega) according to manufacturer's instructions. Metal-labeled antibodies were prepared using  
186 the Maxpar X8 Multimetal Labeling Kit (Fluidigm) according to manufacturer's instructions. After conjugation,  
187 the protein concentration was determined using a NanoDrop (Thermo Scientific), and the metal-labeled



188 antibodies were diluted in Antibody stabilizer PBS (Candor Bioscience) to a concentration of 200 or 300  $\mu\text{g}/\text{ml}$   
189 for long-term storage at 4 °C. Optimal concentrations for antibodies were determined by titration, and antibodies  
190 were managed using the cloud-based platform AirLab as previously described<sup>26</sup>.

191

### 192 **Antibody staining and cell volume quantification**

193 Antibody staining was performed on pooled samples after mass-tag cellular barcoding. The pooled samples were  
194 washed once with CSM. For staining with the EMT antibody panel (Online-only Table 20 on Mendley Data<sup>25</sup>),  
195 cells were incubated for 45 min at 4 °C followed by three washes with CSM. For mass-based cell detection, cells  
196 were stained with 500  $\mu\text{M}$  nucleic acid intercalator iridium (<sup>191</sup>Ir and <sup>193</sup>Ir, Fluidigm) in PBS with 1.6% PFA  
197 (Electron Microscopy Sciences) for 1 h at room temperature or overnight at 4 °C. Cells were washed once with  
198 CSM and once with 0.03% saponin in PBS. For cell volume quantification, cells were stained with 12.5  $\mu\text{g}/\text{ml}$   
199 Bis(2,2'-bipyridine)-4'-methyl-4-carboxybipyridine-ruthenium-N-succidimyl ester-bis(hexafluorophos-phate)  
200 (<sup>96</sup>Ru, <sup>98-102</sup>Ru, <sup>104</sup>Ru, Sigma Aldrich) in 0.1 M sodium hydrogen carbonate (Sigma Aldrich) for 10 min at room  
201 temperature as previously described<sup>23</sup>. Cells were then washed twice with CSM, twice with 0.03% saponin in  
202 PBS, and twice with ddH<sub>2</sub>O. For mass cytometry acquisition, cells were diluted to 0.5 million cells/ml in ddH<sub>2</sub>O  
203 containing 10% EQ<sup>TM</sup> Four Element Calibration Beads (Fluidigm) and filtered through a 40  $\mu\text{m}$  filter cap FACS  
204 tube. Samples were placed on ice and introduced into the Helios upgraded CyTOF2 (Fluidigm) using the Super  
205 Sampler (Victorian Airship) introduction system; data were collected as .fcs files.

206

### 207 **Statistical Analysis**

208

#### 209 **Mass cytometry data preprocessing**

210 Mass cytometry data were concatenated using the .fcs File Concatenation Tool (Cytobank, Inc.), normalized  
211 using the MATLAB version of the Normalizer tool<sup>27</sup>, and debarcoded using the CATALYST R/Bioconductor  
212 package<sup>28</sup>. The .fcs files were uploaded to the Cytobank server (Cytobank, Inc.) for manual gating on populations  
213 of interest. The resulting population was exported as .fcs files and loaded into R (R Development Core Team,  
214 2015) for downstream analysis.

215

#### 216 **FACS surface marker screen data processing**

217 FACS data were compensated on the LSRFortessa Cell Analyzer (BD Biosciences) using single-stained samples.  
218 The .fcs files were uploaded to the Cytobank server (Cytobank, Inc.) for manual debarcoding and gating on  
219 populations of interest. The mean signal intensity per well and population of interest was exported as an excel  
220 sheet. The mean signal intensity of the 'Blank' wells of the screen and the signal intensity of the respective  
221 'Isotype control' well were subtracted. From the resulting intensity values, log<sub>2</sub>-transformed fold changes were  
222 calculated.

223

#### 224 **Dimensionality reduction analyses**

225 For dimensionality reduction visualizations using the t-SNE and UMAP algorithms<sup>29,30,48</sup>, signal intensities (dual  
226 counts) per channel were arcsinh-transformed with a cofactor of 5 (counts\_transf = asinh(x/5)). The R t-SNE  
227 package for Barnes-Hut implementation and the R UMAP implementation package *uwot*  
228 (<https://github.com/jlmelville/uwot>) were used. For marker expression level visualization on t-SNE plots, the  
229 expression was normalized between 0 and 1 to the 99<sup>th</sup> percentile and the top percentile was set to 1.

230

#### 231 **RNA sequencing data analysis**

232 The RNA sequencing data was processed using an analysis setup derived from the ARMOR workflow<sup>31</sup>. Quality  
233 control of the raw FASTQ files was performed using FastQC v0.11.8 (Andrews S, Babraham Bioinformatics,  
234 <https://www.bioinformatics.babraham.ac.uk/projects/fastqc/>). Transcript abundances were estimated using  
235 Salmon v1.2.0<sup>32</sup>, using a transcriptome index based on Gencode release 34<sup>33</sup>, including the full genome as decoy  
236 sequences<sup>34</sup> and setting the k-mer length to 23. For comparison, the reads were also aligned to the genome  
237 (GRCh38.p13) using STAR v2.7.3a<sup>35</sup>. Transcript abundances from Salmon were imported into R v4.0.2 and  
238 aggregated on the gene level using the tximeta Bioconductor package, v1.6.2<sup>36</sup>. The quasi-likelihood framework  
239 of edgeR, v3.30.0<sup>37,38</sup> was used to perform differential gene expression analysis, accounting for differences in  
240 the average length of expressed transcripts between samples<sup>39</sup>. In each comparison, edgeR was used to test the  
241 null hypothesis that the true absolute log<sub>2</sub>-fold change between the compared groups was less than 1. edgeR was  
242 also used to perform exploratory analysis and generate a low-dimensional representation of the samples using

243 multidimensional scaling (MDS). The analysis scripts were run via Snakemake<sup>40</sup>, and all the code is available  
244 on GitHub<sup>41</sup>.

245

## 246 **Data Records**

247

248 A detailed list of all materials used in this study can be found as Online-only Table 1 on  
249 Mendeley Data<sup>25</sup>. RNA sequencing data have been deposited in the ArrayExpress database at  
250 EMBL-EBI with accession number E-MTAB-9365<sup>42</sup>. Tables showing the results of the  
251 differential gene expression analyses and a table reporting the RNA quality and RNA  
252 sequencing mapping metrics have been deposited as Online-only Tables 2-13 on Mendeley  
253 Data<sup>25</sup>. The code used for RNA sequencing data analysis can be found on GitHub<sup>41</sup>. FACS  
254 surface protein screen data as .fcs files and the corresponding data analyses referenced in the  
255 text as Online-only Tables 14-19 have been deposited on Mendeley Data<sup>25</sup>. Furthermore, the  
256 Biologend data sheet corresponding to the FACS screen has been deposited<sup>25</sup>. Mass cytometry  
257 .fcs files of cells after debarcoding ('DebarcodedCellsGate') and of live cells  
258 ('LiveCellsGate') have been deposited on Mendeley Data<sup>25</sup> together with a table containing  
259 .fcs file annotations ('FCS\_File\_Information') and a table corresponding to the antibody panel  
260 used (Online-only Table 20).

261

## 262 **Technical Validation**

263

### 264 **Optimizing the time courses for *in vitro* induction of EMT**

265 We induced EMT in four non-cancerous human mammary epithelial cell lines by chronic  
266 ectopic stimulation with TGFβ1 or 4OHT over several days (Figure 1a; Methods); all four  
267 systems are widely used models of EMT<sup>9,16,21</sup>. We initially carried out a basic characterization  
268 of these models and optimized each induction time course to yield the maximum percentage  
269 of cells with mesenchymal (M) phenotype, characterized by loss of E-Cadherin and  
270 concomitant gain of expression of Vimentin<sup>4</sup>. We excluded apoptotic cells from the analysis  
271 (Figure 1b).

272 On day 12 of chronic exposure to TGFβ1, the HMLE cell line yielded 25% of cells with an  
273 M-phenotype, 33% of cells with a hybrid epithelial-mesenchymal (EM) phenotype with  
274 increased Vimentin expression but no downregulation of E-Cadherin, 28% of an E-  
275 Cadherin<sup>high</sup>Vimentin<sup>low</sup> phenotype (E1), and 14% of an E-Cadherin<sup>low</sup>Vimentin<sup>low</sup> phenotype  
276 (E2) (Figures 1c and 1d). In comparison, on day twelve, 2% of control HMLEs exhibited an  
277 M-phenotype, 5% an EM-phenotype, 84% an E1-phenotype, and 9% an E2-phenotype  
278 (Figures 1c and 1d). Control HMLEs with EM- or E2-phenotype were most abundant during  
279 sparse growth conditions, such as after splitting (Figure 1d, Methods), indicating a regulation  
280 of E-Cadherin and Vimentin levels by growth density<sup>16,43</sup>. As previously reported, treatment  
281 with TGFβ1 induced spindle-like morphological changes<sup>44</sup> and resulted in lower cell density  
282 compared with control<sup>45</sup> (Figure 1e).

283 In the MCF10A cell line, induction of EMT by TGFβ1 treatment occurred in a different time  
284 frame. The percentage of cells with an M-phenotype increased from 54% on day two to 70%  
285 on day eight, the percentage of EM cells (28%) and E1 cells (2%) remained stable across the  
286 time course, and the percentage of E2 cells dropped from 10% to 2% (Figures 1f and 1g). In  
287 control, cells with M-phenotype were at 26% on day 2 and 10% on day 8, cells with EM  
288 phenotype more than doubled from 25% to 64%, the percentage of E1 cells stayed stable at

289 22%, and the E2 cells decreased from 29% to 1% over the time course (Figures 1f and 1g).  
290 As reported, TGF $\beta$ 1-treated MCF10A cells acquired spindle-like morphologies while control  
291 cells retained their cobblestone shape (Figure 1h)<sup>16</sup>. Together, these data show that under  
292 sparse growth conditions on day 2, MCF10A cells exhibit mesenchymal-like phenotypes even  
293 without TGF $\beta$ 1 treatment, reflecting the basal-like character of the cell line<sup>16</sup>. An increase in  
294 cell density over time is accompanied by upregulation of E-Cadherin and therefore loss of the  
295 M-phenotype in control, while stimulation with TGF $\beta$ 1 inhibits an E-Cadherin upregulation  
296 and induces an upregulation of Vimentin. In TGF $\beta$ 1-treated cells, a decrease in the percentage  
297 of cells with M-phenotype on day eight compared with day six, suggests that cell density may  
298 inhibit further EMT<sup>46</sup>.

299 In the HTER and HSER cell lines, EMT was induced by chronic treatment with 4OHT  
300 (Methods). We detected the highest percentage (14%) of 4OHT-treated HTER cells with M-  
301 phenotype on day ten, at which point 26% of cells exhibited an EM-phenotype (Figures 1i and  
302 1j). The percentage of 4OHT-treated HSER cells with M-phenotype peaked at 12% on day  
303 eight and 28% of cells exhibited an EM-phenotype at this time point (Figures 1l and 1m). For  
304 both cell lines, treatment with 4OHT induced spindle-like morphologies and was accompanied  
305 by reduced cell density compared with control (Figure 1k and 1n), as previously reported<sup>9</sup>.  
306 We then assessed possible effects of the 4OHT treatment on HMLEs in the absence of the  
307 Twist1-ER or SNAIL1-ER fusion proteins. As expected, treatment with 4OHT did not induce  
308 EMT or morphological changes in HMLEs (Figures 1o and 1p). In treated and control, the  
309 percentage of cells with M-phenotype was below 1% and cells with EM-phenotype at 11% at  
310 all time points, indicating a basal-like character of the cell line<sup>9</sup>. The majority of treated and  
311 control HMLEs maintained an E1-phenotype throughout the time course (Figure 1o).

312 In conclusion, we could induce EMT in four *in vitro* human cell line models of this process.  
313 We observed phenotypic variability, including both full and partial EMT phenotypes, in  
314 response to 1-2 weeks of chronic stimulation with TGF $\beta$ 1 or 4OHT. Each model followed a  
315 unique EMT timeline and showed varying extents of transition to the mesenchymal  
316 phenotype.

317

### 318 **Transcriptomic profiling of cells undergoing EMT**

319 We next used RNA sequencing to identify markers that distinguish EMT-undergoing cells  
320 from control and markers that distinguish cells with EM-phenotype from cells with E- or M-  
321 phenotype. From the resulting markers, candidates were selected to inform a mass cytometry  
322 antibody panel design. For RNA sequencing, EMT-undergoing HTER cells on day eight and  
323 day twelve were sorted by fluorescence-activated cell sorting (FACS) into three populations:  
324 E-Cadherin<sup>high</sup>CD44<sup>low</sup> (E1-phenotype), E-Cadherin<sup>int</sup>CD44<sup>int</sup> (EM-phenotype), and E-  
325 Cadherin<sup>low</sup>CD44<sup>high</sup> (M-phenotype) (Figure 2a, Methods). CD44 served as a surrogate M-  
326 phenotype marker for intracellular Vimentin to avoid cell permeabilization and RNA loss<sup>9</sup>.  
327 As control, day-matched untreated HTER cells with E1-phenotype were used (Figure 2a). As  
328 a second type of control to monitor possible effects of 4OHT independent of EMT, we  
329 included 4OHT-treated and untreated HMLE cells. We included two to four pairs of  
330 independent biological replicates per condition and collected high quality RNA for all samples  
331 (Online-only Table 2, Methods).

332 RNA sequencing yielded above 20 million reads per sample assigned to genes, except one  
333 sample with 19 million reads (Figure 2b, Online-only Table 2). Mean Phred scores ranged  
334 between 35 and 36, indicating high base call accuracy, and GC content distribution across

335 samples did not indicate any noticeable contamination (Figure 2c, Online-only Table 2). For  
336 all samples, more than 82% of the reads could be uniquely aligned to the human reference  
337 genome using STAR<sup>35</sup>. Mapping to the transcriptome index using Salmon<sup>32</sup> showed that more  
338 than 86% of fragments were assigned to a transcript, with little variation across samples.  
339 We next assessed the similarity of samples based on global gene expression levels using  
340 multidimensional scaling<sup>37,38</sup> (Methods). This showed that the respective pairs of biological  
341 replicates were similar (Figure 2d). Control HTER cells were similar to day-matched 4OHT-  
342 treated and control HMLE cells, indicating few effects of 4OHT on transcription independent  
343 of EMT. This analysis further revealed that 4OHT-treated HTER cells with E-, EM-, and M-  
344 phenotype were all separate from their respective day-matched control (Figure 2d).  
345 Differential gene expression analysis showed that more genes were significantly differentially  
346 expressed between HTER cells with M-phenotype or EM-phenotype and control than between  
347 E-phenotype and control on day eight (Figure 2e, Online-only Tables 3-5). Among  
348 differentially expressed genes between M-phenotype and control, we found upregulation of  
349 canonical markers of EMT<sup>1</sup>, such as the transcription factors *ZEB1*, *ZEB2*, *FOXC2*, and  
350 *PRRX1*, as well as downregulation of typical epithelial markers such as *EPCAM* (Online-only  
351 Table 3). We then asked, which genes were significantly differentially expressed between  
352 HTER cells with EM-phenotype and cells with E- or M-phenotype on day eight and found  
353 three genes (*HHIP*, *FBN1*, *HHIP-AS1*) and one gene (*KIAA1755*), respectively (Figure 2f,  
354 Online-only Tables 6 and 7). When comparing HTER cells on day twelve, more genes were  
355 significantly differentially expressed between cells with M-phenotype and control than  
356 between E-phenotype and control (Figure 2g, Online-only Tables 8 and 9).  
357 In conclusion, 4OHT-treated HTER cells with M-phenotype or EM-phenotype deviated  
358 transcriptionally more from control than cells with E-phenotype. Also, 4OHT-treated cells  
359 with E-phenotype are transcriptionally distinct from control cells with E-phenotype.

360

### 361 **Surface protein expression screen during EMT**

362 We then carried out a FACS-based surface protein screen to identify further markers that  
363 distinguish EMT-undergoing cells from control and M-phenotype cells from E-phenotype  
364 cells, for design of the mass cytometry antibody panel. Treated and control samples of the  
365 HTER, HMLE, and MCF10A cell lines were fixed at multiple time points, fluorescently  
366 barcoded, and co-stained with a combination of surface epithelial markers, E-Cadherin and/or  
367 EpCAM, and a surface mesenchymal marker, CD44, to detect M- and E-phenotypes. The  
368 resulting FACS data were compensated, debarcoded and gated for cell populations of interest  
369 (Figures 3a-c, Methods). We detected expected surface protein abundance differences  
370 between cell populations, confirming the quality of the screening results (Figure 3d). We  
371 identified multiple surface proteins that were more than two-fold differentially expressed  
372 between treated (TGF $\beta$ 1-treated or 4OHT-treated) and control samples (Tables 1-3, Online-  
373 only Tables 14-16), several of which (e.g., CD90, CD146, CD166, CD51, and Podoplanin)  
374 were regulated in more than one cell line (Figure 3e, upper panel). Similarly, we identified  
375 multiple surface proteins that were differentially expressed between cells with M-phenotype  
376 and cells with E-phenotype (Tables 4-6, Online-only Tables 17-19), several of which were  
377 again shared between cell lines, such as CD24, CD56, CD9, TIM-1, EGFR, and CD10 (Figure  
378 3e, lower panel).



379 Based on these FACS screen results and the RNA sequencing analysis, we assembled a panel  
380 of candidate targets to assess phenotypic heterogeneity during EMT in more depth using a  
381 multiplex mass cytometry workflow (Figure 3f, Online-only Table 20).

382

### 383 **Mass cytometric profiling of EMT phenotypes**

384 Mass cytometry is uniquely suited to assess phenotypic heterogeneity during EMT due to its  
385 ability to measure about 40 targets on the single-cell level<sup>20,47</sup>. To ensure high data quality, all  
386 antibodies against the candidate targets were titrated and validated using different cell lines  
387 and conditions (Figure 4a). We then selected EMT-undergoing and control samples at multiple  
388 time points for each of the HMLE, HTER, HSER, and MCF10A cell lines, totalling 92  
389 samples (Figure 4b). The single-cell suspensions were fixed and mass-tag barcoded<sup>24</sup> to allow  
390 the pooling and simultaneous antibody staining of the samples (Methods). We used an  
391 antibody against cleaved CASPASE-3 and cleaved poly(ADP-ribose)-polymerase 1 (PARP1)  
392 to exclude apoptotic cells, yielding more than 1 million live cells for downstream analysis  
393 (Figure 4c). Comparing three biological replicates of the MCF10A cell line using the  
394 dimensionality reduction algorithm Uniform Manifold Approximation and Projection  
395 (UMAP)<sup>48</sup> showed a strong similarity of the triplicates and discrimination of treated and  
396 control samples, except for day 2 control cells (Figures 4d and 4e; Methods). Comparing the  
397 triplicates of the HMLE cell line using UMAP also confirmed a strong similarity, however,  
398 treated and control samples were less separable (Figures 4f and 4g). Applying the t-distributed  
399 stochastic neighbor embedding (t-SNE)<sup>30</sup> dimensionality reduction algorithm to all samples  
400 visualized the phenotypic diversity of EMT-undergoing cells between the different cell lines  
401 and in comparison with the respective control (Figures 4h and 4i). In MCF10A cells, we  
402 observed a co-upregulation of CD44, Podoplanin, CD146, and CD51 upon EMT induction  
403 compared with control and concomitant downregulation of E-Cadherin and K5. In the HMLE,  
404 HTER, and HSER cell lines, Vimentin, CD44, CD90, CD51, and CD10 were co-upregulated  
405 in EMT-undergoing cells compared with control (Figures 4h and 4i). In conclusion, we  
406 assembled an antibody panel for multiplex mass cytometry characterization of EMT and  
407 discovered a vast phenotypic diversity of EMT states among four widely used human *in vitro*  
408 models of this process.

409

### 410 **Code Availability**

411 The code used for RNA sequencing data analysis can be found on GitHub<sup>41</sup> and can be  
412 accessed without restrictions. Please refer to the Statistical Analysis section above for more  
413 details on software versions.

414

### 415 **References**

- 416 1. Thiery, J. P., Acloque, H., Huang, R. Y. J. & Nieto, M. A. Epithelial-mesenchymal transitions in  
417 development and disease. *Cell* (2009). doi:10.1016/j.cell.2009.11.007
- 418 2. Fischer, K. R. *et al.* Epithelial-to-mesenchymal transition is not required for lung metastasis but contributes  
419 to chemoresistance. *Nature* (2015). doi:10.1038/nature15748
- 420 3. Marjanovic, N. D., Weinberg, R. A. & Chaffer, C. L. Cell plasticity and heterogeneity in cancer. *Clinical*  
421 *Chemistry* (2013). doi:10.1373/clinchem.2012.184655
- 422 4. Nieto, M. A., Huang, R. Y. Y. J., Jackson, R. A. A. & Thiery, J. P. P. EMT: 2016. *Cell* (2016).  
423 doi:10.1016/j.cell.2016.06.028
- 424 5. Paoli, P., Giannoni, E. & Chiarugi, P. Anoikis molecular pathways and its role in cancer progression.  
425 *Biochimica et Biophysica Acta - Molecular Cell Research* (2013). doi:10.1016/j.bbamcr.2013.06.026

- 426 6. Desgrosellier, J. S. & Cherech, D. A. Integrins in cancer: biological implications in therapeutic  
427 opportunities. *Cancer, Nat Rev* (2015). doi:10.1038/nrc2748.Integrins
- 428 7. Cao, Z., Livas, T. & Kyprianou, N. Anoikis and EMT: Lethal “Liaisons” during Cancer Progression. *Crit.*  
429 *Rev. Oncog.* (2016). doi:10.1615/CritRevOncog.2016016955
- 430 8. Micalizzi, D. S., Farabaugh, S. M. & Ford, H. L. Epithelial-mesenchymal transition in cancer: parallels  
431 between normal development and tumor progression. *J. Mammary Gland Biol. Neoplasia* (2010).  
432 doi:10.1007/s10911-010-9178-9
- 433 9. Mani, S. A. *et al.* The Epithelial-Mesenchymal Transition Generates Cells with Properties of Stem Cells.  
434 *Cell* **133**, 704–715 (2008).
- 435 10. Morel, A. P. *et al.* Generation of breast cancer stem cells through epithelial-mesenchymal transition. *PLoS*  
436 *One* (2008). doi:10.1371/journal.pone.0002888
- 437 11. Lamouille, S., Xu, J. & Derynck, R. Molecular mechanisms of epithelial-mesenchymal transition. *Nature*  
438 *Reviews Molecular Cell Biology* (2014). doi:10.1038/nrm3758
- 439 12. Tam, W. L. & Weinberg, R. A. The epigenetics of epithelial-mesenchymal plasticity in cancer. *Nature*  
440 *Medicine* (2013). doi:10.1038/nm.3336
- 441 13. Jordan, N. V., Johnson, G. L. & Abell, A. N. Tracking the intermediate stages of epithelial-mesenchymal  
442 transition in epithelial stem cells and cancer. *Cell Cycle* (2011). doi:10.4161/cc.10.17.17188
- 443 14. Thomson, S. *et al.* A systems view of epithelial-mesenchymal transition signaling states. *Clin. Exp.*  
444 *Metastasis* (2011). doi:10.1007/s10585-010-9367-3
- 445 15. Tan, T. Z. *et al.* Epithelial-mesenchymal transition spectrum quantification and its efficacy in deciphering  
446 survival and drug responses of cancer patients. *EMBO Mol. Med.* (2014). doi:10.15252/emmm.201404208
- 447 16. Sarrió, D., Rodríguez-pinilla, S. M., Hardisson, D. & Sarrio, D. Epithelial-Mesenchymal Transition in  
448 Breast Cancer Relates to the Basal-like Phenotype Epithelial-Mesenchymal Transition in Breast Cancer  
449 Relates to the Basal-like Phenotype. 989–997 (2008). doi:10.1158/0008-5472.CAN-07-2017
- 450 17. Sorlie, T. *et al.* Gene expression patterns of breast carcinomas distinguish tumor subclasses with clinical  
451 implications. *Proc. Natl. Acad. Sci. U. S. A.* **98**, 10869–10874 (2001).
- 452 18. Wagner, J. *et al.* A Single-Cell Atlas of the Tumor and Immune Ecosystem of Human Breast Cancer. *Cell*  
453 (2019). doi:10.1016/j.cell.2019.03.005
- 454 19. Zeisberg, M. & Neilson, E. G. Biomarkers for epithelial-mesenchymal transitions. *Journal of Clinical*  
455 *Investigation* (2009). doi:10.1172/JCI36183
- 456 20. Bandura, D. R. *et al.* Mass cytometry: Technique for real time single cell multitarget immunoassay based  
457 on inductively coupled plasma time-of-flight mass spectrometry. *Anal. Chem.* **81**, 6813–6822 (2009).
- 458 21. Elenbaas, B. *et al.* Human breast cancer cells generated by oncogenic transformation of primary mammary  
459 epithelial cells. *Genes Dev.* (2001). doi:10.1101/gad.828901
- 460 22. Brown, K. A. *et al.* Induction by transforming growth factor- $\beta$ 1 of epithelial to mesenchymal transition is  
461 a rare event in vitro. *Breast Cancer Res.* (2004). doi:10.1186/bcr778
- 462 23. Rapsomaniki, M. A. *et al.* CellCycleTRACER accounts for cell cycle and volume in mass cytometry data.  
463 *Nat. Commun.* **9**, (2018).
- 464 24. Zunder, E. R. *et al.* Palladium-based mass tag cell barcoding with a doublet-filtering scheme and single-  
465 cell deconvolution algorithm. *Nat. Protoc.* **10**, 316–333 (2015).
- 466 25. Wagner, J. *et al.* Mass Cytometric and Transcriptomic Profiling of Epithelial-Mesenchymal Transitions in  
467 Human Mammary Cell Lines. *Mendeley Data* (2021). doi:doi: 10.17632/pt3gmyk5r2.1
- 468 26. Catena, R., Özcan, A., Jacobs, A., Chevrier, S. & Bodenmiller, B. AirLab: A cloud-based platform to  
469 manage and share antibody-based single-cell research. *Genome Biol.* **17**, (2016).
- 470 27. Finck, R. *et al.* Normalization of mass cytometry data with bead standards. *Cytom. Part A* **83 A**, 483–494  
471 (2013).
- 472 28. Chevrier, S. *et al.* Compensation of Signal Spillover in Suspension and Imaging Mass Cytometry. *Cell Syst.*  
473 **6**, 612-620.e5 (2018).
- 474 29. Amir, E. A. D. *et al.* ViSNE enables visualization of high dimensional single-cell data and reveals  
475 phenotypic heterogeneity of leukemia. *Nat. Biotechnol.* **31**, 545–552 (2013).
- 476 30. Van Der Maaten, L. & Hinton, G. Visualizing Data using t-SNE. *J. Mach. Learn. Res.* **9**, 2579–2605 (2008).
- 477 31. Orjuela, S., Huang, R., Hembach, K. M., Robinson, M. D. & Sonesson, C. ARMOR: An automated  
478 reproducible modular workflow for preprocessing and differential analysis of RNA-seq data. *G3 Genes,*  
479 *Genomes, Genet.* (2019). doi:10.1534/g3.119.400185
- 480 32. Patro, R., Duggal, G., Love, M. I., Irizarry, R. A. & Kingsford, C. Salmon provides fast and bias-aware

- 481 quantification of transcript expression. *Nat. Methods* (2017). doi:10.1038/nmeth.4197
- 482 33. Frankish, A. *et al.* GENCODE reference annotation for the human and mouse genomes. *Nucleic Acids Res.*
- 483 (2019). doi:10.1093/nar/gky955
- 484 34. Srivastava, A. *et al.* Alignment and mapping methodology influence transcript abundance estimation.
- 485 *Genome Biol.* (2020). doi:10.1186/s13059-020-02151-8
- 486 35. Dobin, A. *et al.* STAR: Ultrafast universal RNA-seq aligner. *Bioinformatics* (2013).
- 487 doi:10.1093/bioinformatics/bts635
- 488 36. Love, M. I. *et al.* Tximeta: Reference sequence checksums for provenance identification in RNA-seq. *PLoS*
- 489 *Comput. Biol.* (2020). doi:10.1371/journal.pcbi.1007664
- 490 37. Robinson, M. D., McCarthy, D. J. & Smyth, G. K. edgeR: A Bioconductor package for differential
- 491 expression analysis of digital gene expression data. *Bioinformatics* (2009).
- 492 doi:10.1093/bioinformatics/btp616
- 493 38. Lun, A. T. L., Chen, Y. & Smyth, G. K. It's DE-licious: A recipe for differential expression analyses of
- 494 RNA-seq experiments using quasi-likelihood methods in edgeR. in *Methods in Molecular Biology* (2016).
- 495 doi:10.1007/978-1-4939-3578-9\_19
- 496 39. Sonesson, C., Love, M. I. & Robinson, M. D. Differential analyses for RNA-seq: transcript-level estimates
- 497 improve gene-level inferences. *F1000Research* (2015). doi:10.12688/f1000research.7563.1
- 498 40. Köster, J. & Rahmann, S. Snakemake—a scalable bioinformatics workflow engine. *Bioinformatics* (2012).
- 499 doi:10.1093/bioinformatics/bts480
- 500 41. Wagner, J. *et al.* Mass Cytometric and Transcriptomic Profiling of Epithelial-Mesenchymal Transitions in
- 501 Human Mammary Cell Lines. *GitHub* (2021). <https://github.com/csoneson/WagnerEMT2020>
- 502 42. Wagner, J. *et al.* RNA-seq of two human mammary epithelial cell lines (HMLE and HMLE-Twist-ER)
- 503 treated with 4-hydroxytamoxifen vs control. *ArrayExpress* (2021).
- 504 <http://www.ebi.ac.uk/arrayexpress/experiments/E-MTAB-9365>
- 505 43. Conacci-Sorrell, M. *et al.* Autoregulation of E-cadherin expression by cadherin-cadherin interactions: The
- 506 roles of  $\beta$ -catenin signaling, Slug, and MAPK. *J. Cell Biol.* (2003). doi:10.1083/jcb.200308162
- 507 44. Xu, J., Lamouille, S. & Derynck, R. TGF- $\beta$ -induced epithelial to mesenchymal transition. *Cell Research*
- 508 (2009). doi:10.1038/cr.2009.5
- 509 45. Siegel, P. M. & Massagué, J. Cytostatic and apoptotic actions of TGF- $\beta$  in homeostasis and cancer. *Nature*
- 510 *Reviews Cancer* (2003). doi:10.1038/nrc1208
- 511 46. Puliafito, A. *et al.* Collective and single cell behavior in epithelial contact inhibition. (2011).
- 512 doi:10.1073/pnas.1007809109
- 513 47. Di Palma, S. & Bodenmiller, B. Unraveling cell populations in tumors by single-cell mass cytometry.
- 514 *Current Opinion in Biotechnology* **31**, 122–129 (2015).
- 515 48. McInnes, L., Healy, J., Saul, N. & Großberger, L. UMAP: Uniform Manifold Approximation and
- 516 Projection. *J. Open Source Softw.* (2018). doi:10.21105/joss.00861

517

## 518 **Acknowledgements**

519 We thank the Bodenmiller lab and the Robinson lab for fruitful discussions. We thank

520 Stéphane Chevrier and the University of Zurich Cytometry Facility for advice and help

521 regarding all FACS experiments. We thank Vito R. T. Zanutelli for advice regarding data

522 visualizations. We thank the ETH Zurich Genomics Facility Basel for excellent RNA

523 sequencing service. We thank the Weinberg lab for their gift of the HMLE, HMLE-Twist-ER,

524 and HMLE-Snail-ER cell lines. B.B.'s research is funded by a SNSF R'Equip grant, a SNSF

525 Assistant Professorship grant, the SystemsX Transfer Project "Friends and Foes", the

526 SystemsX MetastasiX and PhosphoNetX grants, and by the European Research Council

527 (ERC) under the European Union's Seventh Framework Program (FP/2007-2013)/ERC Grant

528 Agreement n. 336921. M.D.R. acknowledges support from UZH's URPP Evolution in Action.

529

## 530 **Author contributions**

531 J.W. and B.B. conceived the study. J.W. performed the cell culture experiments together with

532 M.M. and A.J.. J.W. and M.M. performed the FACS surface marker screens with help from

533 A.J. and the mass cytometry stainings with the corresponding data processing and  
534 interpretation. J.W. performed the FACS sorting and RNA isolation experiments prior to RNA  
535 sequencing. C.S. and M.D.R. performed RNA sequencing data analysis. N.D. performed the  
536 UMAP data visualizations. J.W., N.d.S., and B.B. wrote the manuscript with input from all  
537 authors.

538

539 **Competing interests**

540 The authors declare no competing interests.



541 **Figures**

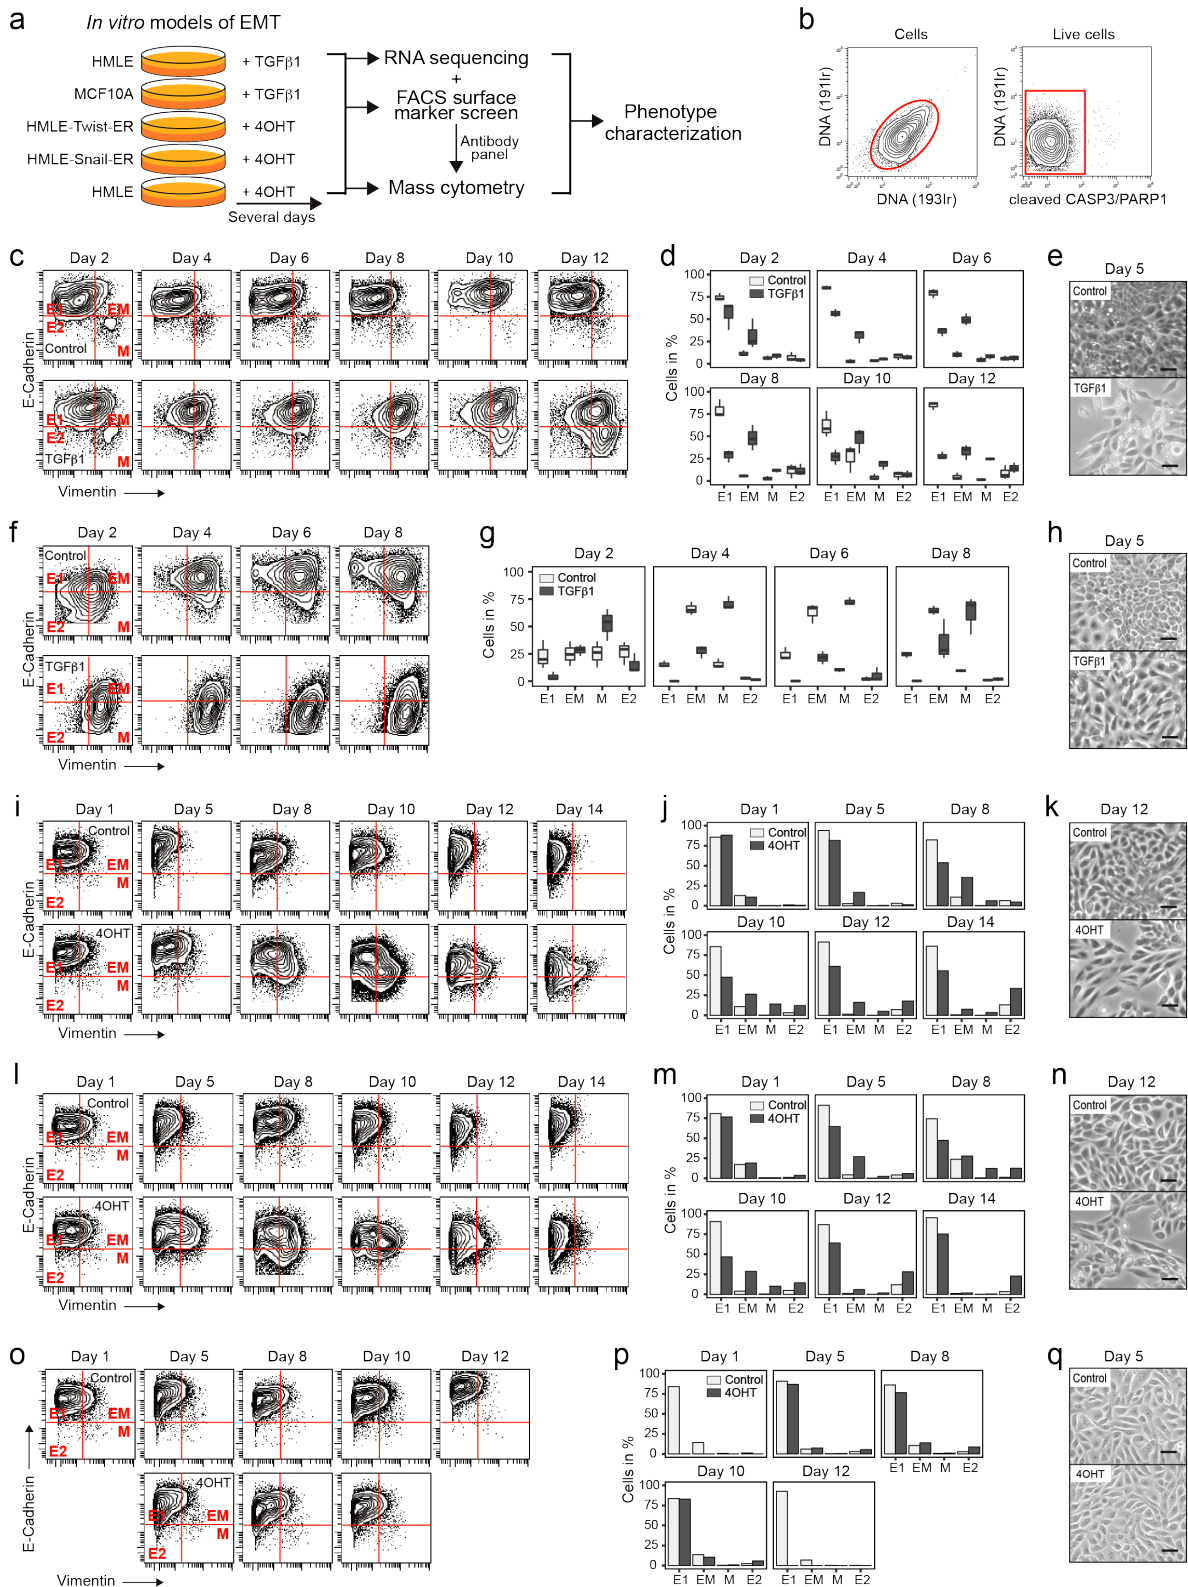

542

543 Figure 1. Induction of EMT in human mammary epithelial cell lines.

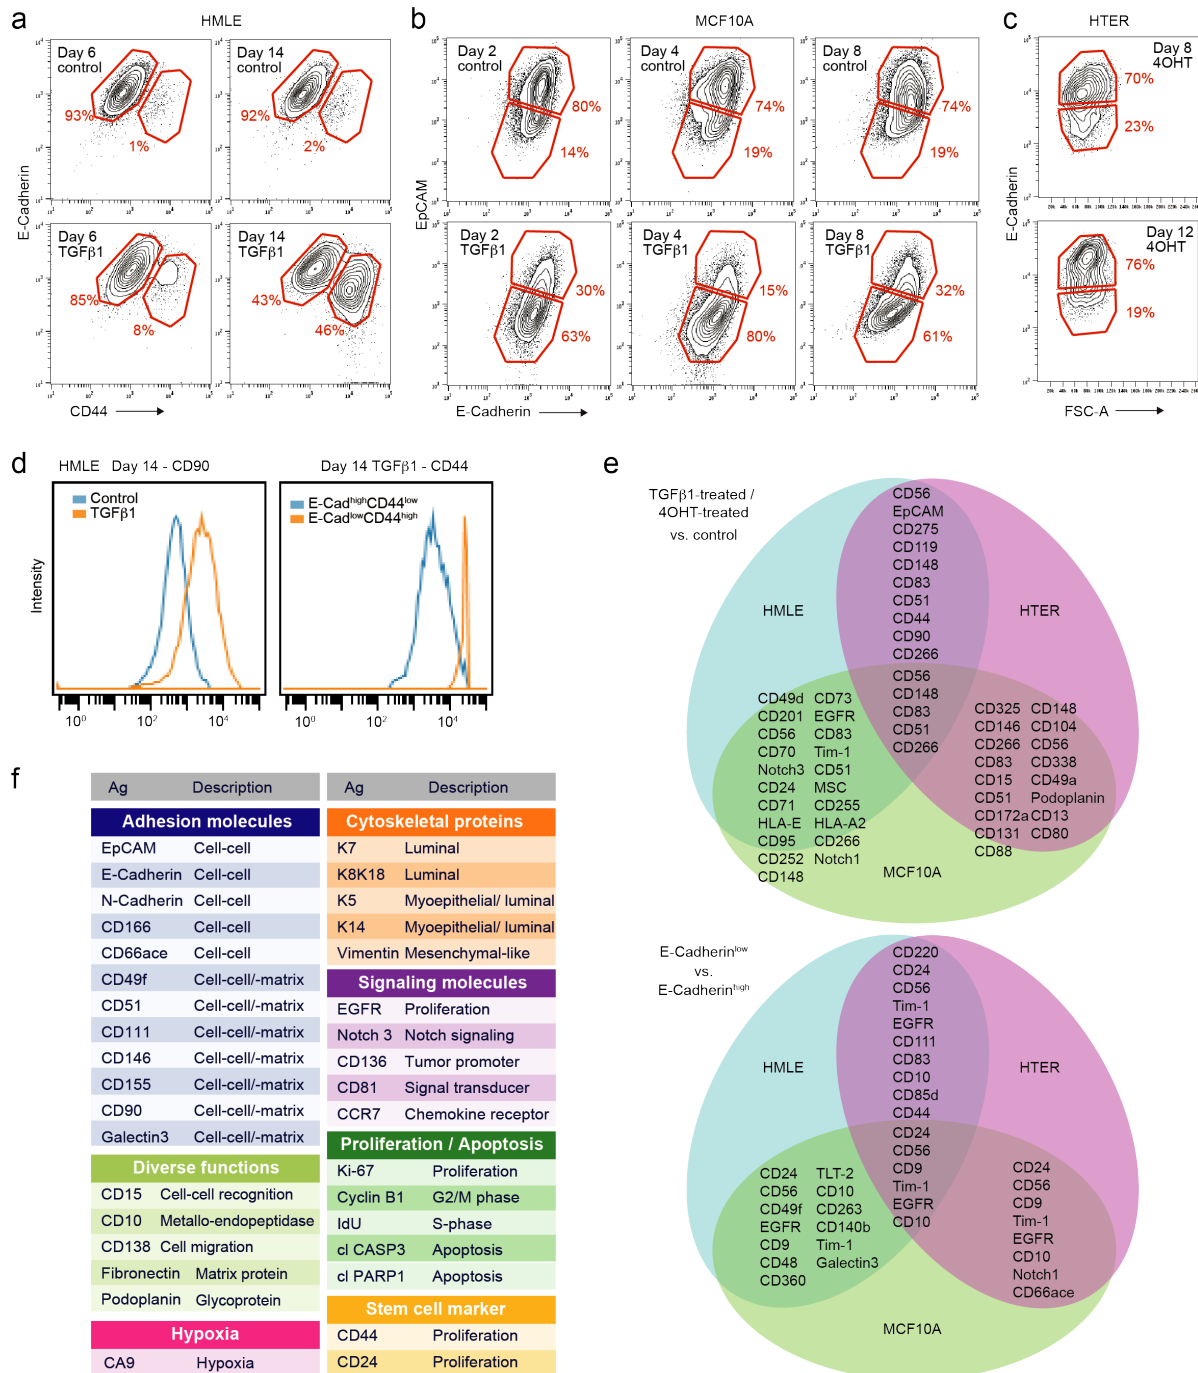

544

545 Figure 2. Transcriptomic profiling of EMT-undergoing mammary epithelial cells.

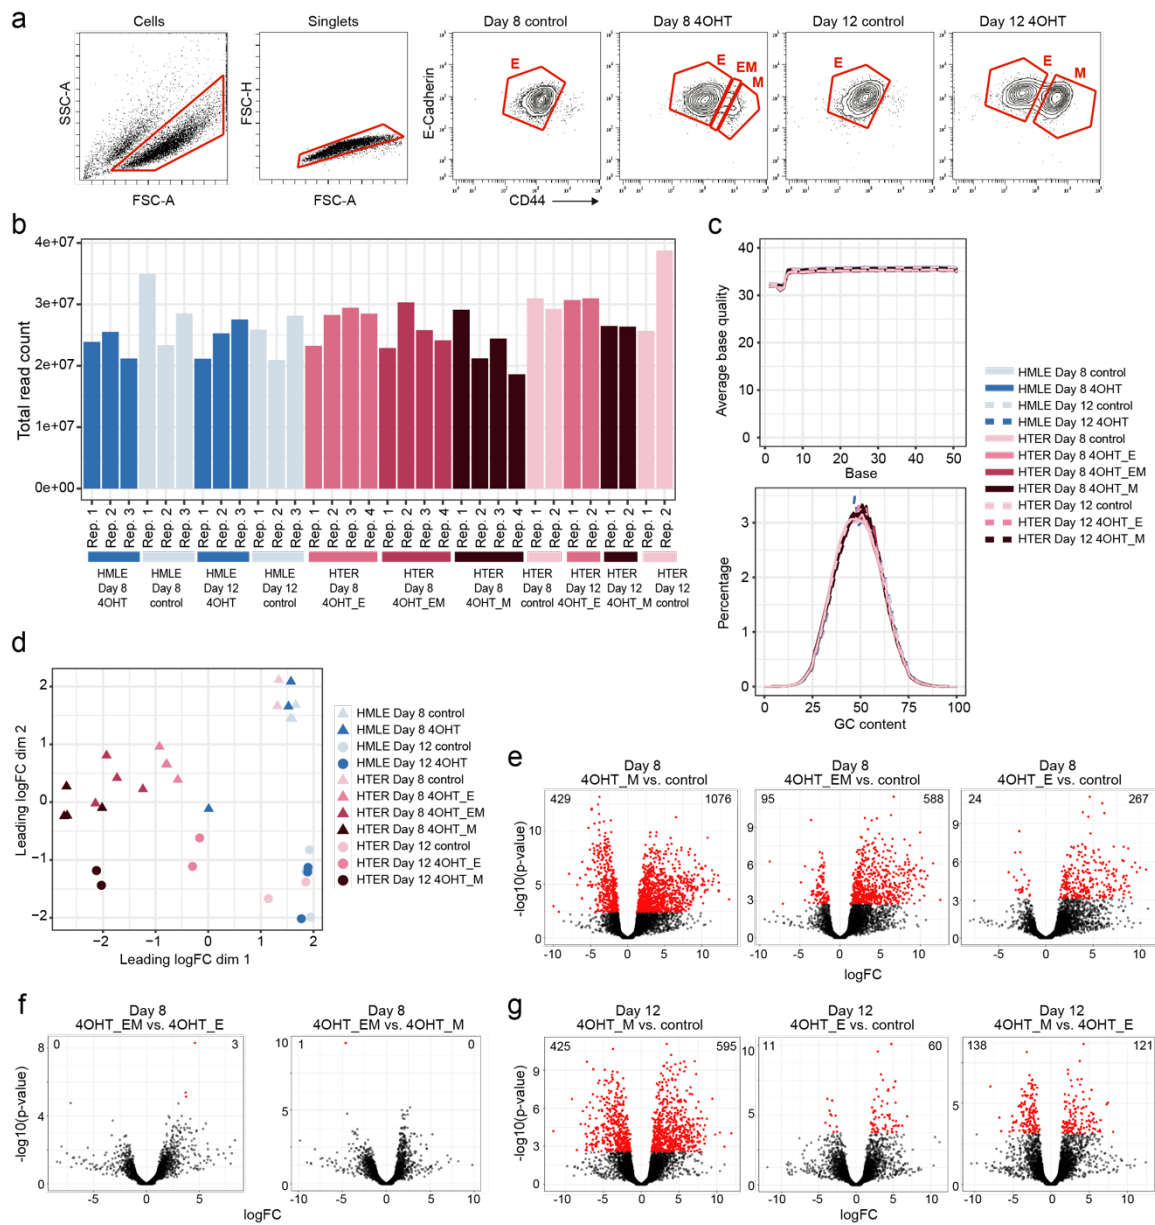

546

547

Figure 3. FACS surface protein profiling of EMT-undergoing mammary epithelial cells.

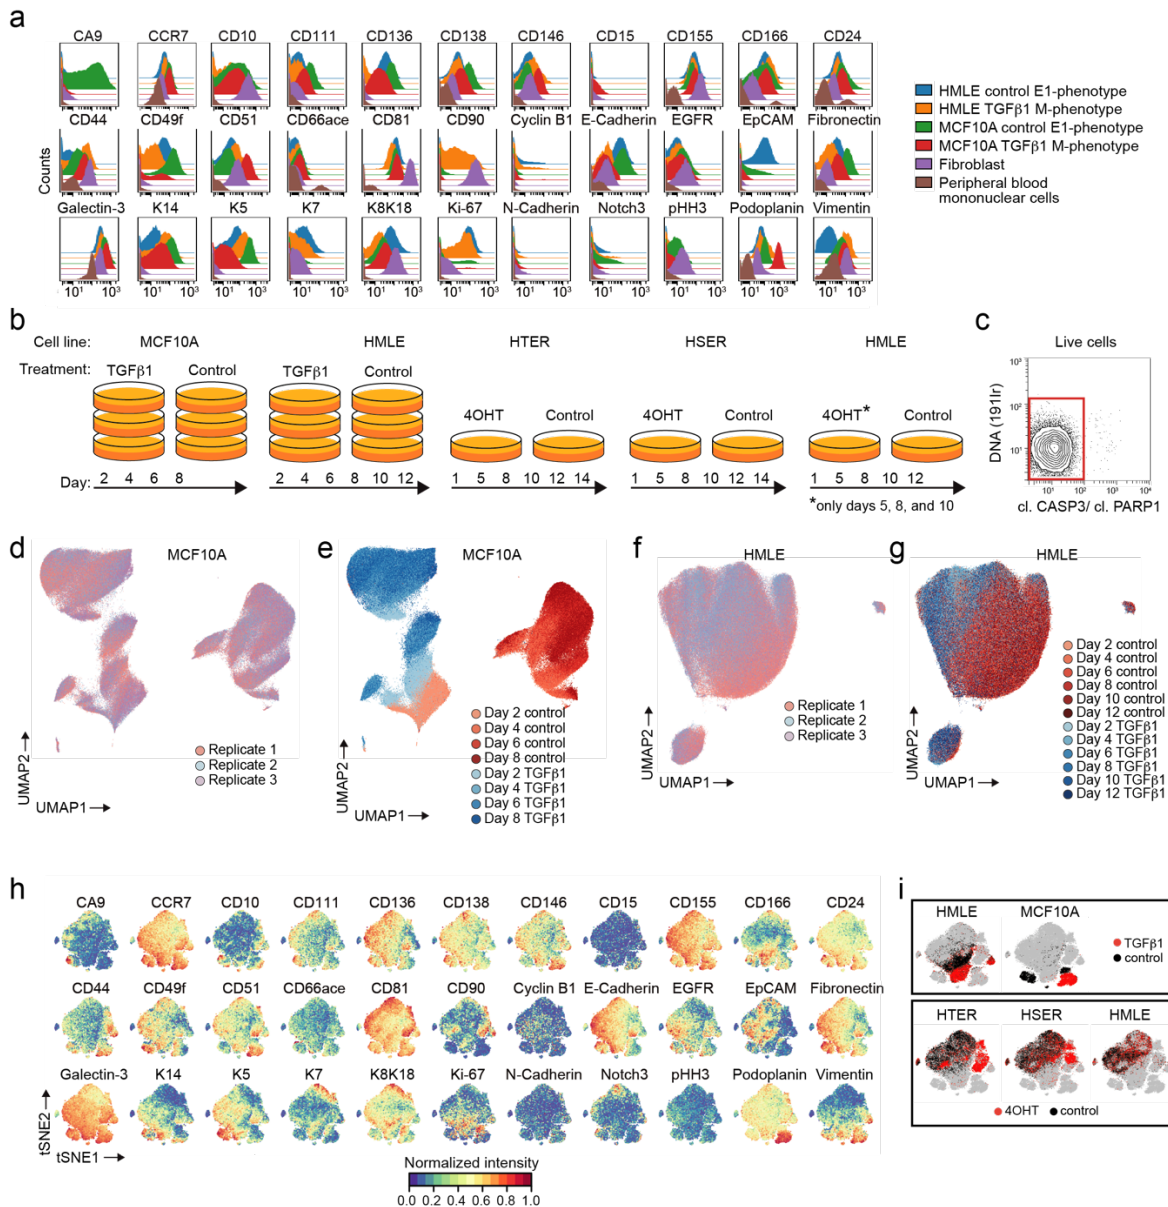

548

549 Figure 4. Multiplex mass cytometry profiling of EMT phenotypes.

550

551

## 552 Figure Legends

553

554 **Figure 1.** Induction of EMT in human mammary epithelial cell lines. (a) Experimental

555 workflow. (b) Gating to select live cells. (c) E-Cadherin and Vimentin expression in HMLEs.

556 Gating to select populations with E1-, E2-, EM-, or M-phenotype. (d) Percentages of HMLEs

557 per gate and time point as in (c). (e) Phase contrast images of HMLEs. (f) E-Cadherin and

558 Vimentin expression in MCF10As. (g) Percentage of MCF10As cells per gate and time point

559 as in (f). (h) Phase contrast images of MCF10As. (i) E-Cadherin and Vimentin expression in

560 HTERs. (j) Percentage of HTERs per gate and time point as in (i). (k) Phase contrast images

561 of HTERs. (l) E-Cadherin and Vimentin expression in HSERs. (m) Percentage of HSERs per

562 gate and time point as in (l). (n) Phase contrast images of HSERs. (o) E-Cadherin and

563 Vimentin expression in HMLEs. (p) Percentage of HMLEs per gate and time point as in (o).

564 (q) Phase contrast images of HMLEs. Scale bar = 10 μm. E1 = epithelial 1, E2 = epithelial 2,

565 EM = hybrid epithelial-mesenchymal, M = mesenchymal.



566

567 **Figure 2.** Transcriptomic profiling of EMT-undergoing mammary epithelial cells. (a) Gating  
568 to select populations of interest of HTERs for RNA sequencing. (b) Number of RNA  
569 sequencing reads assigned to genes per sample. (c) Average base quality (upper panel) and  
570 GC content (lower panel) for all samples. (d) Multidimensional scaling plot showing the first  
571 two dimensions. (e-g) Volcano plots showing the indicated differential gene expression  
572 analyses. Highlighted in red are genes with an adjusted p-value below 0.05. logFC = log2 fold  
573 change, E = epithelial, EM = hybrid epithelial-mesenchymal, M = mesenchymal.

574

575 **Figure 3.** FACS surface protein profiling of EMT-undergoing mammary epithelial cells. (a)  
576 Gating to select populations with E-Cadherin<sup>high</sup>CD44<sup>low</sup> or E-Cadherin<sup>low</sup>CD44<sup>high</sup>  
577 phenotype. (b) Gating to select populations with E-Cadherin<sup>high</sup>EpCAM<sup>high</sup> or E-  
578 Cadherin<sup>low</sup>EpCAM<sup>low</sup> phenotype. (c) Gating to select populations with E-Cadherin<sup>high</sup> or E-  
579 Cadherin<sup>low</sup> phenotype. (d) Histogram overlays of HMLEs comparing CD90 levels in TGFβ1-  
580 treated versus control (left panel) and CD44 levels in the E-Cadherin<sup>high</sup>CD44<sup>low</sup> and E-  
581 Cadherin<sup>low</sup>CD44<sup>high</sup> populations (right panel). (e) Proteins that were more than two-fold  
582 regulated between treated cells and control (upper panel) or between treated cells with E-  
583 Cadherin<sup>high</sup> or E-Cadherin<sup>low</sup> phenotype (lower panel). (f) Candidate antibody panel for mass  
584 cytometry analysis.

585

586 **Figure 4.** Multiplex mass cytometry profiling of EMT phenotypes. (a) Histogram overlays  
587 showing the antibody panel performance. (b) Types of samples collected for mass cytometry.  
588 (c) Gating to select live cells. (d-e) UMAPs showing TGFβ1-treated and control MCF10As  
589 colored by biological replicates (d) and by day and treatment (e). (f-g) UMAPs showing  
590 TGFβ1-treated and control HMLEs colored by biological replicates (f) and by day and  
591 treatment (g). (h) t-SNE maps showing the expression of markers on 52,000 cells after a 0 to  
592 1 normalization. For each cell line, 1,000 representative cells were chosen from control and  
593 treated samples at all time points as indicated in (b). Only one replicate was used for  
594 MCF10As and HMLEs. (i) t-SNE maps as in (h), highlighting in black the cells from the  
595 indicated cell lines. For each line, both control and treated cells are shown.

596 **Tables**

| Specificity      | Day 6 TGFβ1/<br>Day 6 control | Day 14 TGFβ1/<br>Day 14 control | Day 14 TGFβ1/<br>Day 6 TGFβ1 |
|------------------|-------------------------------|---------------------------------|------------------------------|
| CD148            | -4.10                         | NA                              | NA                           |
| CD104            | -1.83                         | NA                              | NA                           |
| NPC (57D2)       | -1.51                         | 0.58                            | 2.01                         |
| CD326 (EpCAM)    | -1.31                         | -2.71                           | -1.11                        |
| CD184 (CXCR4)    | -0.95                         | 0.56                            | 1.84                         |
| CD300e (IREM-2)  | -0.92                         | -2.35                           | -0.11                        |
| CD275 (ICOSL)    | -0.88                         | -1.82                           | -0.74                        |
| CD56 (NCAM)      | -0.24                         | -1.44                           | -0.42                        |
| CD338 (ABCG2)    | -0.23                         | -1.47                           | -1.31                        |
| CD44             | -0.01                         | 3.08                            | 3.17                         |
| CD49a            | 0.15                          | 2.08                            | 1.05                         |
| CD166            | 0.68                          | 2.54                            | 1.81                         |
| Podoplanin       | 0.82                          | 2.90                            | 1.82                         |
| CD54             | 0.86                          | 1.61                            | 1.11                         |
| CD90 (Thy1)      | 0.90                          | 2.88                            | 1.95                         |
| CD13             | 0.92                          | 1.96                            | 1.17                         |
| CD263 (TRAIL-R3) | 0.96                          | 1.55                            | 0.30                         |
| CD80             | 0.97                          | 1.64                            | 0.37                         |
| N-Cadherin       | 1.25                          | 1.78                            | 0.01                         |
| CD146            | 1.25                          | 2.68                            | 0.51                         |
| E-Cadherin       | 1.44                          | 2.26                            | -0.53                        |
| CD266 (TWEAKR)   | 1.48                          | 2.02                            | 0.12                         |
| CD83             | 1.49                          | 2.33                            | 0.89                         |
| CD119 (IFNγR1)   | 2.06                          | 1.05                            | -1.09                        |
| CD15 (SSEA-1)    | 2.07                          | 1.74                            | 0.31                         |
| CD182 (CXCR2)    | 2.66                          | 4.39                            | 0.14                         |
| CD51             | 2.76                          | NA                              | 0.68                         |
| CD172a (SIRPa)   | 3.51                          | 5.34                            | 0.01                         |
| CD162            | 3.55                          | NA                              | 0.57                         |
| CD134            | 5.37                          | NA                              | -0.14                        |
| CD131            | NA                            | 4.74                            | 0.46                         |
| CD71             | NA                            | NA                              | -4.36                        |

597 Table 1: FACS screen results for HMLE cells showing log2 fold changes selected for at least  
598 two-fold differences (highlighted in red).

| Specificity       | Day 2 TGFβ1/<br>Day 2 control | Day 4 TGFβ1/<br>Day 4 control | Day 8 TGFβ1/<br>Day 8 control |
|-------------------|-------------------------------|-------------------------------|-------------------------------|
| CD201 (EPCR)      | -5.58                         | NA                            | NA                            |
| CD148             | -3.46                         | NA                            | 1.95                          |
| CD165             | -2.23                         | -2.51                         | NA                            |
| E-Cadherin        | -1.61                         | -2.17                         | -1.70                         |
| MSC (W3D5)        | -1.51                         | -3.75                         | -2.72                         |
| Notch 1           | -1.38                         | 0.97                          | 0.53                          |
| CD1a              | -1.35                         | 1.52                          | -2.70                         |
| CD9               | -1.28                         | -2.22                         | -1.61                         |
| CD97              | -1.17                         | -2.82                         | -2.44                         |
| CD111             | -0.99                         | -2.00                         | -2.65                         |
| CD70              | -0.89                         | -1.20                         | -1.44                         |
| CD298             | -0.87                         | -1.92                         | -1.89                         |
| Notch 2           | -0.79                         | -1.18                         | -1.25                         |
| CD55              | -0.77                         | -1.14                         | -1.30                         |
| CD96              | -0.71                         | 3.61                          | 1.60                          |
| CD325             | -0.62                         | 1.57                          | 1.44                          |
| EGFR              | -0.50                         | -0.33                         | -1.28                         |
| CD56 (NCAM)       | -0.45                         | 0.27                          | 2.45                          |
| CD46              | -0.43                         | -1.23                         | -1.45                         |
| TCR Vb8           | -0.36                         | -1.48                         | 1.85                          |
| CD95              | -0.35                         | -1.02                         | -1.24                         |
| CD11b (activated) | -0.34                         | NA                            | 1.02                          |
| CD338 (ABCG2)     | -0.33                         | 2.58                          | 0.45                          |
| MSC (W5C5)        | -0.30                         | -1.80                         | -1.63                         |
| Tim-4             | -0.25                         | 1.54                          | 0.46                          |
| Siglec-10         | -0.22                         | 1.05                          | 0.50                          |
| DR3 (TRAMP)       | -0.22                         | 0.47                          | 1.20                          |
| Siglec-9          | -0.20                         | 1.03                          | 0.46                          |
| CD15 (SSEA-1)     | -0.14                         | 1.12                          | 0.66                          |
| Notch 3           | -0.12                         | 2.35                          | 0.78                          |
| CD115             | -0.10                         | 0.08                          | 1.78                          |
| b2-microglobulin  | -0.09                         | -0.57                         | -1.11                         |
| CD158a/h          | -0.08                         | -1.06                         | 0.07                          |
| CD255 (TWEAK)     | -0.06                         | 0.84                          | 1.49                          |
| CD156c (ADAM10)   | 0.00                          | -1.05                         | -1.04                         |
| CD47              | 0.02                          | -0.45                         | -1.05                         |
| CD39              | 0.11                          | -2.84                         | 0.34                          |
| CD49f             | 0.13                          | -0.83                         | -1.07                         |
| CD1d              | 0.14                          | 2.14                          | 0.03                          |
| Tim-1             | 0.15                          | 1.14                          | 0.52                          |
| CD88              | 0.16                          | 0.10                          | -2.60                         |
| CD215 (IL-15Ra)   | 0.18                          | 1.24                          | 0.58                          |
| HLA-E             | 0.19                          | 1.42                          | 0.56                          |
| CD86              | 0.20                          | 3.31                          | -0.16                         |
| HLA-A2            | 0.24                          | 1.38                          | 0.08                          |
| CD66a/c/e         | 0.24                          | -1.93                         | -3.58                         |
| CD24              | 0.26                          | 0.02                          | 1.11                          |
| HER2              | 0.28                          | 1.60                          | NA                            |
| CD101 (BB27)      | 0.31                          | -1.00                         | -0.63                         |
| CD167a            | 0.31                          | 1.37                          | 1.72                          |
| IGF-1R            | 0.34                          | 0.65                          | 1.11                          |
| CD104             | 0.35                          | -1.05                         | -1.27                         |
| CD89              | 0.35                          | -2.28                         | -3.49                         |
| CD268             | 0.47                          | 1.39                          | -0.49                         |
| Notch 4           | 0.47                          | -0.93                         | -1.97                         |
| CD220             | 0.48                          | 0.75                          | -1.07                         |
| CD252 (OX40L)     | 0.48                          | 1.08                          | 1.37                          |
| CD141             | 0.56                          | -1.01                         | 0.86                          |
| CD318 (CDCP1)     | 0.60                          | -0.23                         | -1.45                         |
| CD63              | 0.64                          | 1.07                          | 1.23                          |
| CD114             | 0.65                          | 0.25                          | 1.48                          |
| CD83              | 0.76                          | 1.54                          | 1.46                          |
| CD258             | 0.77                          | 1.37                          | -0.75                         |
| CD105             | 0.87                          | 1.14                          | 1.77                          |
| CD266             | 1.02                          | 0.79                          | 0.37                          |
| CD80              | 1.04                          | -0.18                         | -0.54                         |
| CD49a             | 1.14                          | 1.31                          | 1.19                          |
| TCR Vb23          | 1.15                          | 1.55                          | 0.62                          |
| CD172a (SIRPa)    | 1.22                          | 0.96                          | 0.57                          |
| CD13              | 1.30                          | 1.44                          | 1.20                          |
| CD116             | 1.36                          | 1.36                          | 0.43                          |
| CD146             | 1.38                          | 2.36                          | 2.07                          |
| CD5               | 1.49                          | 0.00                          | -0.02                         |
| CD1b              | 1.51                          | -0.35                         | 0.32                          |
| CD138             | 1.76                          | 0.26                          | -0.55                         |
| CD73              | 2.48                          | 3.16                          | 1.82                          |
| CD131             | 2.54                          | 0.19                          | 0.73                          |
| Podoplanin        | 2.87                          | 3.33                          | 2.44                          |
| CD51              | 2.95                          | 2.96                          | 2.25                          |
| CD49d             | 6.52                          | 3.79                          | 0.51                          |
| CD273             | 7.98                          | 2.69                          | 4.51                          |
| FcRL6             | NA                            | 0.04                          | -1.16                         |
| HLA-ABC           | NA                            | NA                            | -2.26                         |
| CD71              | NA                            | NA                            | -3.19                         |

599 Table 2: FACS screen results for MCF10A cells showing log<sub>2</sub> fold changes selected for at  
 600 least two-fold differences (highlighted in red).  
 601

| Specificity             | Day 8 4OHT/<br>Day 0 control | Day 12 4OHT/<br>Day 0 control | Day 12 4OHT/<br>Day 8 4OHT |
|-------------------------|------------------------------|-------------------------------|----------------------------|
| CD20                    | -4.17                        | -0.57                         | 3.60                       |
| CD49d                   | -2.67                        | -3.07                         | -0.39                      |
| CD300F                  | -2.36                        | NA                            | NA                         |
| CD28                    | -2.12                        | -1.86                         | 0.27                       |
| CD201 (EPCR)            | -1.99                        | 0.44                          | 2.43                       |
| CD56 (NCAM)             | -1.84                        | -0.53                         | 1.31                       |
| CD70                    | -1.43                        | 0.32                          | 1.75                       |
| Notch 3                 | -1.39                        | -0.11                         | 1.29                       |
| CD24                    | -1.33                        | -1.23                         | 0.10                       |
| EpCAM                   | -1.32                        | -3.72                         | -2.40                      |
| CD335 (NKp46)           | -1.19                        | -1.13                         | 0.06                       |
| CD1c                    | -0.93                        | 0.39                          | 1.32                       |
| CD340 (HER2)            | -0.88                        | 0.70                          | 1.59                       |
| CD271                   | -0.87                        | 0.40                          | 1.28                       |
| CD85d (ILT4)            | -0.86                        | 0.65                          | 1.51                       |
| CD170 (Siglec-5)        | -0.82                        | -2.39                         | -1.56                      |
| CD71                    | -0.80                        | -1.40                         | -0.60                      |
| CD275 (ICOSL)           | -0.79                        | 1.00                          | 1.78                       |
| CD104                   | -0.61                        | 0.93                          | 1.54                       |
| CD109                   | -0.57                        | 0.86                          | 1.43                       |
| HLA-E                   | -0.40                        | 1.09                          | 1.48                       |
| CD95                    | -0.16                        | 1.09                          | 1.25                       |
| CD221 (IGF-1R)          | -0.06                        | 1.10                          | 1.16                       |
| CD252 (OX40L)           | 0.06                         | 1.19                          | 1.13                       |
| CD119 (IFN $\gamma$ R1) | 0.07                         | 1.09                          | 1.02                       |
| CD148                   | 0.09                         | 1.19                          | 1.10                       |
| CD33                    | 0.20                         | 1.47                          | 1.27                       |
| CD73                    | 0.33                         | 1.26                          | 0.93                       |
| MAIR-II                 | 0.35                         | 1.17                          | 0.82                       |
| EGFR                    | 0.37                         | 1.47                          | 1.11                       |
| CD83                    | 0.43                         | 1.53                          | 1.10                       |
| Tim-1                   | 0.44                         | 1.45                          | 1.01                       |
| CD79b                   | 0.46                         | 1.09                          | 0.63                       |
| CD51                    | 0.50                         | 1.14                          | 0.64                       |
| HLA-A,B,C               | 0.73                         | 1.11                          | 0.37                       |
| CD44                    | 0.86                         | 1.17                          | 0.30                       |
| MSC (W5C5)              | 0.90                         | 2.75                          | 1.86                       |
| CD90 (Thy1)             | 0.94                         | 1.45                          | 0.51                       |
| CD200 (OX2)             | 0.95                         | 2.06                          | 1.11                       |
| CD255 (TWEAK)           | 0.97                         | 2.09                          | 1.12                       |
| CD93                    | 1.11                         | 1.83                          | 0.72                       |
| HLA-A2                  | 1.16                         | 1.16                          | 0.00                       |
| CD266 (TWEAK-R)         | 1.31                         | 0.07                          | -1.24                      |
| MSC (W3D5)              | 1.56                         | 3.75                          | 2.19                       |
| CD10                    | 2.02                         | 3.62                          | 1.60                       |
| CD38                    | 5.61                         | 4.69                          | -0.92                      |
| Notch 1                 | NA                           | 2.44                          | NA                         |
| CD290                   | NA                           | NA                            | -2.71                      |

602 Table 3: FACS screen results for HTER cells showing log<sub>2</sub> fold changes selected for at least  
 603 two-fold differences (highlighted in red).  
 604



| Specificity            | Day 6                                                                                           | Day 14 |
|------------------------|-------------------------------------------------------------------------------------------------|--------|
|                        | E-Cadherin <sup>low</sup> CD44 <sup>high</sup> / E-Cadherin <sup>high</sup> CD44 <sup>low</sup> |        |
| CD24                   | -6.04                                                                                           | -3.11  |
| CD56 (NCAM)            | -1.95                                                                                           | -1.14  |
| BTLA                   | -1.74                                                                                           | -1.70  |
| Podoplanin             | -1.40                                                                                           | -0.33  |
| TCR V $\alpha$ 9       | -1.32                                                                                           | -0.64  |
| DR3 (TRAMP)            | -1.28                                                                                           | -0.81  |
| CD158f                 | -1.27                                                                                           | -0.80  |
| CD111                  | -1.14                                                                                           | -0.42  |
| CD49f                  | -1.01                                                                                           | -1.05  |
| EGFR                   | -0.94                                                                                           | -1.23  |
| CD9                    | -0.65                                                                                           | -1.09  |
| CD119 (IFN $\gamma$ R) | -0.64                                                                                           | 1.32   |
| CD48                   | -0.50                                                                                           | -1.02  |
| CD324 (E-Cadherin)     | -0.29                                                                                           | -1.39  |
| CD166                  | 0.67                                                                                            | 2.17   |
| CD54                   | 0.99                                                                                            | 1.22   |
| CD231 (TALLA)          | 1.00                                                                                            | -0.06  |
| Mac-2 (Galectin-3)     | 1.00                                                                                            | -0.13  |
| CD59                   | 1.03                                                                                            | 0.30   |
| CD196                  | 1.06                                                                                            | 0.15   |
| CD210 (IL10 R)         | 1.09                                                                                            | -0.34  |
| CD344 (Frizzled-4)     | 1.10                                                                                            | -0.15  |
| CD182 (CXCR2)          | 1.16                                                                                            | -0.24  |
| TLT-2                  | 1.17                                                                                            | -0.10  |
| CD162                  | 1.17                                                                                            | 0.44   |
| CD63                   | 1.19                                                                                            | 0.73   |
| CD317                  | 1.22                                                                                            | 0.04   |
| HLA-E                  | 1.23                                                                                            | -0.04  |
| CD181 (CXCR1)          | 1.24                                                                                            | -0.21  |
| CD99                   | 1.24                                                                                            | -0.03  |
| CD213a2                | 1.33                                                                                            | -0.05  |
| Siglec-8               | 1.35                                                                                            | 0.03   |
| CD252 (OX40L)          | 1.36                                                                                            | -0.02  |
| CD255 (TWEAK)          | 1.41                                                                                            | -0.20  |
| FcRL6                  | 1.44                                                                                            | -0.22  |
| CD90 (Thy1)            | 1.44                                                                                            | 1.37   |
| CD205                  | 1.45                                                                                            | 0.04   |
| CD80                   | 1.49                                                                                            | -0.12  |
| CD360 (IL-21R)         | 1.51                                                                                            | -0.07  |
| MSC (W5C5)             | 1.52                                                                                            | -0.16  |
| N-Cadherin             | 1.52                                                                                            | 0.18   |
| CD1b                   | 1.55                                                                                            | -0.38  |
| CX3CR1                 | 1.56                                                                                            | -0.49  |
| CD357                  | 1.57                                                                                            | -0.05  |
| C5L2                   | 1.59                                                                                            | 0.15   |
| CD10                   | 1.60                                                                                            | 4.27   |
| CD43                   | 1.63                                                                                            | -0.03  |
| CD263                  | 1.69                                                                                            | 0.05   |
| CD140b                 | 1.72                                                                                            | -0.06  |
| TCR V $\beta$ 13.2     | 1.86                                                                                            | NA     |
| CD218a                 | 1.91                                                                                            | 0.48   |
| SSEA-5                 | 1.93                                                                                            | -0.01  |
| CD301                  | 1.97                                                                                            | -0.27  |
| NPC (57D2)             | 2.00                                                                                            | -0.10  |
| TCR $\alpha$ /d        | 2.02                                                                                            | -0.26  |
| CD215                  | 2.04                                                                                            | 0.29   |
| CD116                  | 2.15                                                                                            | -0.36  |
| CD226                  | 2.16                                                                                            | -0.11  |
| CD134                  | 2.16                                                                                            | 1.34   |
| CD179a                 | 2.22                                                                                            | -0.35  |
| TCR V $\beta$ 23       | 2.30                                                                                            | NA     |
| CD270                  | 2.41                                                                                            | -0.20  |
| CD74                   | 2.45                                                                                            | 0.07   |
| CD307d                 | 2.57                                                                                            | -0.18  |
| CD220                  | 2.74                                                                                            | -0.34  |
| NKp80                  | 2.74                                                                                            | -0.08  |
| CD158d                 | 2.77                                                                                            | -0.13  |
| CD79b                  | 2.83                                                                                            | -0.02  |
| CD253                  | 2.89                                                                                            | -0.07  |
| CD44                   | 3.35                                                                                            | 3.01   |
| CD13                   | 3.39                                                                                            | 0.98   |
| Tim-1                  | 3.42                                                                                            | 0.15   |
| CD83                   | 3.49                                                                                            | 1.40   |
| CD197                  | 3.55                                                                                            | -0.08  |
| CD114                  | 3.87                                                                                            | -0.14  |
| Jagged 2               | 4.79                                                                                            | 0.95   |

605 Table 4: FACS screen results for TGF $\beta$ 1-treated HMLE cells showing log<sub>2</sub> fold changes  
606 selected for at least two-fold differences (highlighted in red).  
607

| Specificity   | Day 2                                                                                                    | Day 4 | Day 8 |
|---------------|----------------------------------------------------------------------------------------------------------|-------|-------|
|               | <b>EpCAM<sup>low</sup> E-Cadherin<sup>low</sup> /<br/>EpCAM<sup>high</sup> E-Cadherin<sup>high</sup></b> |       |       |
| EGFR          | -2.30                                                                                                    | -1.70 | -2.49 |
| CD24          | -1.99                                                                                                    | -2.63 | -2.45 |
| CD56 (NCAM)   | -1.89                                                                                                    | -1.93 | -1.31 |
| Notch 1       | -1.81                                                                                                    | -1.58 | -1.28 |
| CD9           | -1.63                                                                                                    | -2.44 | -2.75 |
| CD148         | -1.43                                                                                                    | -1.82 | -1.85 |
| DR3 (TRAMP)   | -1.43                                                                                                    | -1.39 | -1.58 |
| Tim-1         | -1.30                                                                                                    | -2.03 | -2.69 |
| Pre-BCR       | -1.25                                                                                                    | -1.87 | -2.42 |
| CD49f         | -1.22                                                                                                    | -1.32 | -1.35 |
| CD140b        | -1.17                                                                                                    | -1.58 | -3.00 |
| CD48          | -1.15                                                                                                    | -1.58 | -1.50 |
| CD131         | -1.14                                                                                                    | -1.27 | -1.66 |
| CD95          | -1.14                                                                                                    | -1.20 | -1.21 |
| Integrin a9b1 | -1.12                                                                                                    | -1.51 | -1.81 |
| TLT-2         | -1.09                                                                                                    | -1.65 | -1.75 |
| CD263         | -1.00                                                                                                    | -1.18 | -1.92 |
| CD82          | -1.00                                                                                                    | -1.07 | -1.29 |
| CD10          | 1.15                                                                                                     | 2.14  | 1.37  |

608 Table 5: FACS screen results for TGFβ1-treated MCF10A cells showing log<sub>2</sub> fold changes  
609 selected for at least two-fold differences (highlighted in red).  
610

|                    | Day 8                                                       | Day 12 | Day 12 / Day 8 |
|--------------------|-------------------------------------------------------------|--------|----------------|
| <b>Specificity</b> | <b>E-Cadherin<sup>low</sup> / E-Cadherin<sup>high</sup></b> |        |                |
| EpCAM              | -4.19                                                       | -5.93  | -6.55          |
| CD275              | -3.94                                                       | -1.25  | 5.48           |
| CD220              | -3.18                                                       | -2.10  | -2.15          |
| CD104              | -2.97                                                       | -10.04 | -5.46          |
| CD271              | -2.58                                                       | -2.93  | 1.03           |
| CD282              | -2.06                                                       | NA     | NA             |
| CD33               | -1.76                                                       | -1.18  | 1.88           |
| Notch 3            | -1.75                                                       | 1.29   | 4.09           |
| CD24               | -1.57                                                       | -2.29  | -1.27          |
| CD170              | -1.50                                                       | -1.29  | -2.04          |
| CD15               | -1.37                                                       | -1.23  | -0.10          |
| CD9                | -1.29                                                       | -1.62  | 0.57           |
| CD201              | -1.28                                                       | -0.49  | 3.31           |
| CD56               | -1.22                                                       | -1.38  | 1.55           |
| CD324              | -1.20                                                       | -1.42  | 0.44           |
| CD261              | -1.11                                                       | -1.15  | 0.46           |
| CD338              | -1.10                                                       | -1.76  | -1.57          |
| Tim-1              | -0.91                                                       | -0.21  | 1.34           |
| CD11b              | -0.88                                                       | -1.04  | 0.17           |
| EGFR               | -0.82                                                       | -1.69  | 0.33           |
| CD141              | -0.80                                                       | -0.86  | 0.55           |
| CD111              | -0.79                                                       | -1.17  | 0.26           |
| CD340              | -0.74                                                       | -0.13  | 2.02           |
| CD262              | -0.71                                                       | -0.01  | 1.64           |
| CD52               | -0.69                                                       | -2.86  | -1.56          |
| CD49f              | -0.67                                                       | -1.45  | -0.79          |
| MSC                | -0.66                                                       | -0.87  | 2.02           |
| CD221              | -0.64                                                       | -0.62  | 1.14           |
| MSC                | -0.62                                                       | -0.89  | 1.43           |
| CD95               | -0.60                                                       | -0.22  | 1.68           |
| CD34               | -0.58                                                       | -0.37  | 1.16           |
| CD109              | -0.57                                                       | -0.76  | 1.30           |
| CD318              | -0.57                                                       | -1.23  | -1.03          |
| CD81               | -0.55                                                       | 0.01   | 1.34           |
| BTLA               | -0.54                                                       | -1.07  | 0.40           |
| CD252              | -0.49                                                       | -0.24  | 1.38           |
| CD119              | -0.48                                                       | 0.94   | 1.84           |
| HLA-E              | -0.48                                                       | -0.39  | 1.59           |
| CD197              | -0.43                                                       | -0.29  | 1.00           |
| CD266              | -0.41                                                       | -0.62  | -1.49          |
| MAIR-II            | -0.37                                                       | -0.01  | 1.24           |
| CD94               | -0.33                                                       | 0.07   | 1.40           |
| Mac-2              | -0.32                                                       | -0.27  | 1.04           |
| CD277              | -0.14                                                       | 0.16   | 1.36           |
| CD166              | -0.13                                                       | 0.76   | 1.13           |
| CD200              | -0.02                                                       | 0.20   | 1.13           |
| CD73               | 0.01                                                        | 0.41   | 1.52           |
| CD70               | 0.07                                                        | 1.33   | 2.84           |
| CD290              | 0.21                                                        | NA     | NA             |
| CD83               | 0.24                                                        | 1.08   | 1.68           |
| CD85d              | 0.42                                                        | -1.34  | 0.79           |
| CD304              | 0.51                                                        | NA     | -0.74          |
| CD10               | 0.93                                                        | 2.30   | 2.45           |
| CD1c               | 1.44                                                        | -2.06  | -0.69          |
| CD44               | 2.04                                                        | 3.41   | 0.55           |
| Siglec-9           | NA                                                          | 4.95   | 1.84           |
| CD314              | NA                                                          | 0.39   | 1.01           |

611 Table 6: FACS screen results for 4OHT-treated HTER cells showing log<sub>2</sub> fold changes  
612 selected for at least two-fold differences (highlighted in red).
